# Supplementary material for: Epoxy composites filled with one-dimensional SiC nanowires–two-dimensional graphene nanoplatelets hybrid nanofillers
Source: Royal Society of Chemistry journal article supplement (doi:10.1039/c4ra07878k), 2014-01-01
Supplement: c4ra07878k1.pdf [file c4ra07878k1.pdf]

## SUPPORTING INFORMATION

# Epoxy Composites Filled with One-Dimensional SiC nanowires—Two-Dimensional Graphene Nanoplatelets Hybrid Nanofillers

Yi Wang<sup>a</sup>, Jinhong Yu<sup>a\*</sup>, Wen Dai<sup>a</sup>, Dong Wang<sup>a</sup>, Yingze Song<sup>a</sup>, Hua Bai<sup>a</sup>, Xufeng Zhou<sup>a</sup>,  
Chaoyang Li<sup>b</sup>, Cheng-Te Lin<sup>a\*</sup>, Nan Jiang<sup>a\*</sup>

*a. Key Laboratory of Marine New Materials and Related Technology, Zhejiang Key Laboratory of Marine Materials and Protection Technology, Ningbo Institute of Material Technology and Engineering, Chinese Academy of Sciences, Ningbo 315201, People's Republic of China*

*b. Research Institute & School of Systems Engineering, Kochi University of Technology, Kami city, Kochi 782-8502, Japan*

\*Corresponding author. Tel: +86 574 86685171, E-mail address: [yujinhong@nimte.ac.cn](mailto:yujinhong@nimte.ac.cn)

Tel: +86 574 86685171, E-mail address: [linzhengde@nimte.ac.cn](mailto:linzhengde@nimte.ac.cn)

Tel: +86 574 87615701, E-mail address: [jiangnan@nimte.ac.cn](mailto:jiangnan@nimte.ac.cn)

## SUPPLEMENT

The schematic mechanism of SiC nanowires (presented in [Figure S1](#)) contributes us to understanding the growth process of Fe-catalyzed SiC nanowires, which is agreement with the typical vapor–liquid–solid (VLS) growth process.

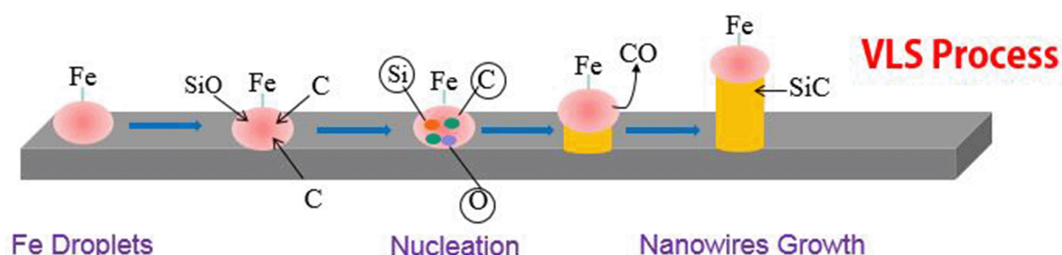

**Figure S1.** Schematic growth mechanism for the SiC nanowires under Fe-assisted condition.

**Figure S2** shows that side and top view photograph of neat epoxy and epoxy composite at 2 wt% filler loading. It is more visual and convenient to observe sedimentation in the composites by using digital images. For observation, it is apparent that no obvious sedimentation can be found, so we come to conclusion that the filler are dispersing homogeneously in the matrix.

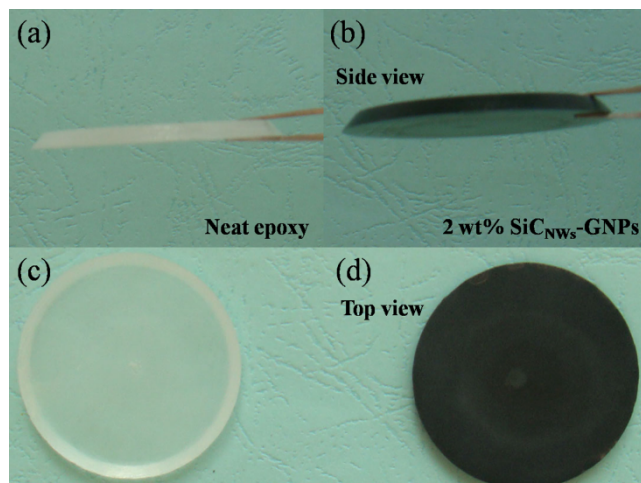

**Figure S2.** Side view of: (a) neat epoxy and (b) epoxy composite at 2 wt% SiC<sub>NWs</sub>-GNPs nanofiller loading, top view of: (c) neat epoxy and (d) epoxy composite at 2 wt% nanofiller loading.

The TEM images of the epoxy composites, as shown in **Figure S3**, help demonstrate the dispersion state of SiC<sub>NWs</sub>-GNPs nanoplatelets within matrix in this study.

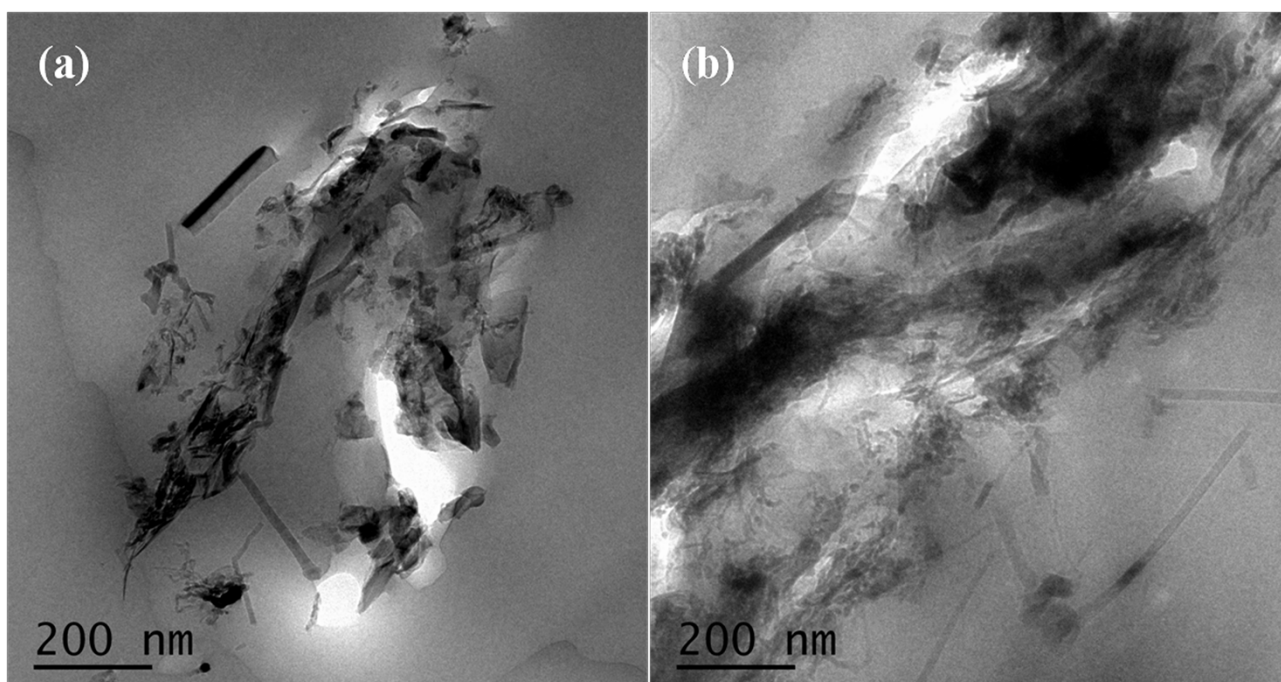

**Figure S3.** TEM images of epoxy composites with SiC<sub>NWs</sub>-GNPs nanofiller: (a) 0.5 wt%, (b) 4 wt%.
